# Supplementary material
Source: MDPI journal article supplement (https://www.mdpi.com/2072-4292/13/12/2404)
Supplement: s1 [file s1]

## Supplementary Materials – Dataset

The following document gives additional information on the dataset used in the paper “Crop nitrogen retrieval methods for simulated Sentinel-2 data using in-field spectrometer data”. Details on the sensors and how the data was collected can be found in the materials & methods part of the article. The locations of the datapoints are displayed in Figure 1. Figure 2 displays the average temperature and rainfall for the measurement region. Table 1 lists the number of different crops in the dataset. Figure 3 gives the exact BBCH growth stages of the measurements. Please note that since the dataset originates from three different projects/field campaigns, not all entries have measurements for all traits. The dataset can be downloaded from: <https://doi.org/10.3929/ethz-b-000488405>.

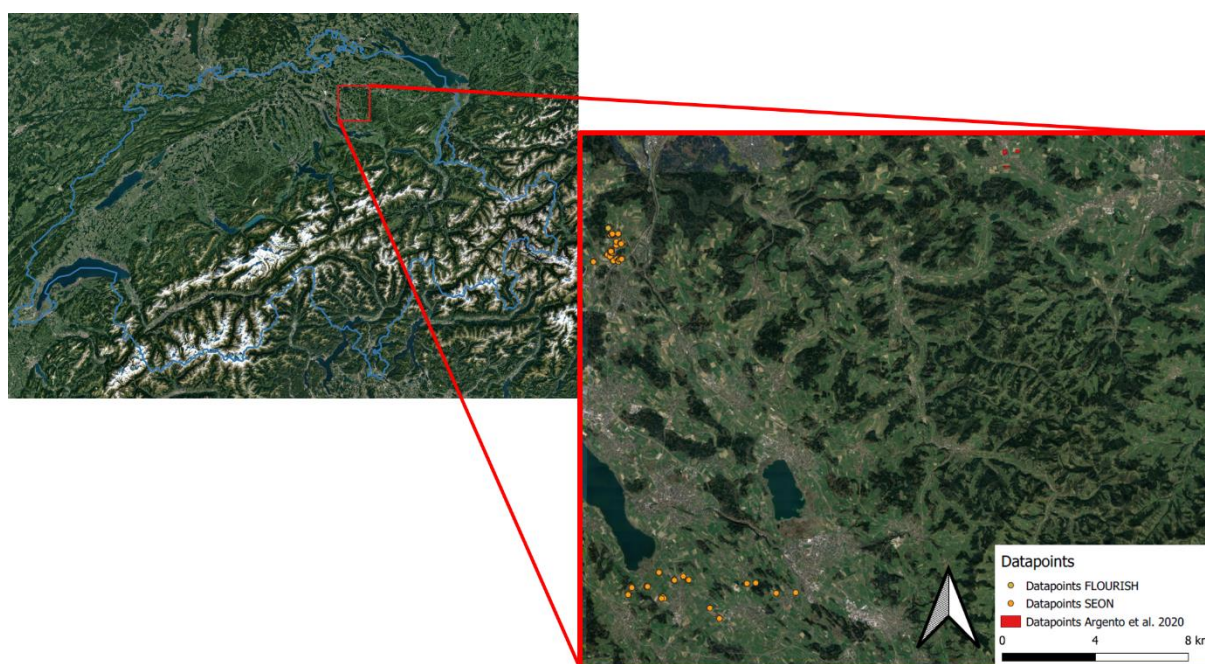

**Figure S1.** Location of the measurements where data was sampled for this paper.

**Figure S2.** Detailed BBCH stages of the dataset.

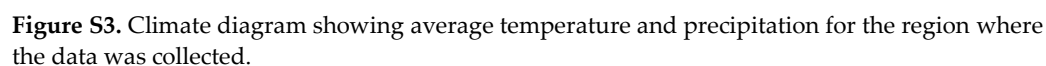

| Crop           | N   |
|----------------|-----|
| winter_wheat   | 171 |
| sugar_beet     | 65  |
| corn           | 51  |
| summer_barley  | 36  |
| buckwheat      | 20  |
| potatoes       | 13  |
| sunflower      | 12  |
| temp_grassland | 10  |
| winter_barley  | 10  |
| perm_grassland | 3   |
| summer_wheat   | 1   |
